# Supplementary material for: Necrotizing Gingivitis: Microbial Diversity and Quantification of Protein Secretion in Necrotizing Gingivitis
Source: MDPI journal article supplement (doi:10.3390/antibiotics10101197), 2021-10-01
Supplement: s1 [file s1]

## Supplementary Table S1

Characteristics of 16S rRNA-directed oligonucleotide probes used for FISH; target organisms, rRNA sequences, target site and formamide concentration (F)

| Probe <sup>1</sup> | Target                                                                      | Sequence (5' – 3') <sup>2</sup>   | 5' modification    | Target Site | F (%)   | Source       |
|--------------------|-----------------------------------------------------------------------------|-----------------------------------|--------------------|-------------|---------|--------------|
| EUB338             | most eubacteria                                                             | GCT GCC TCC CGT AGG AGT           | Carboxyfluorescein | 338 - 355   | 40 - 50 | [11, 18, 19] |
| CFB935             | <i>Bacteroides</i> -<br>Porphyromonas-Prevotella<br>subgroup of Bacteroidia | CCA CAT GTT CCT CCG CTT GT        | Cy3                | 935 - 954   | 50      | [17]         |
| BAC303             | Bacteroides-Prevotella<br>subgroup of Bacteroidia                           | CCAATG TGG GGG ACC TT             | Cy3                | 303 - 319   | 50      | [16]         |
| PRV392             | Prevotella spp.                                                             | GCA CGC TAC TTG GCT GG            | Cy3                | 392 - 308   | 50      | [22]         |
| Pend740            | <i>Porphyromonas</i><br><i>endodontalis</i>                                 | CAG TGT CAG ACG GAG CCT           | Cy3                | 740 - 757   | 40      | [21]         |
| L-Pgin1006-2       | <i>Porphyromonas gingivalis</i>                                             | GTT TTC ACC ATC <b>MG</b> T CAT C | Cy3                | 1006 - 1024 | 45      | [20]         |
| Tfor127            | <i>Tannerella forsythia</i>                                                 | CTC TGT TGC GGG CAG GTT AC        | Cy3                | 127 - 146   | 40      | [4]          |

<sup>1</sup> Probes were labeled at the 5'-end with Cy3 or carboxyfluorescein. The designations of probes containing locked-nucleic-acid (LNA) substitutions start with L-.

<sup>2</sup> Characters printed in bold indicate LNA substitutions. LNA incorporated DNA probes (LNA/DNA probes) have been described to improve significantly fluorescence intensity in comparison to conventional DNA probes with the same sequence [117].
