# Supplementary figures and images for: Necrotizing Gingivitis: Microbial Diversity and Quantification of Protein Secretion in Necrotizing Gingivitis
Source: MDPI journal article supplement (doi:10.3390/antibiotics10101197), 2021-10-01

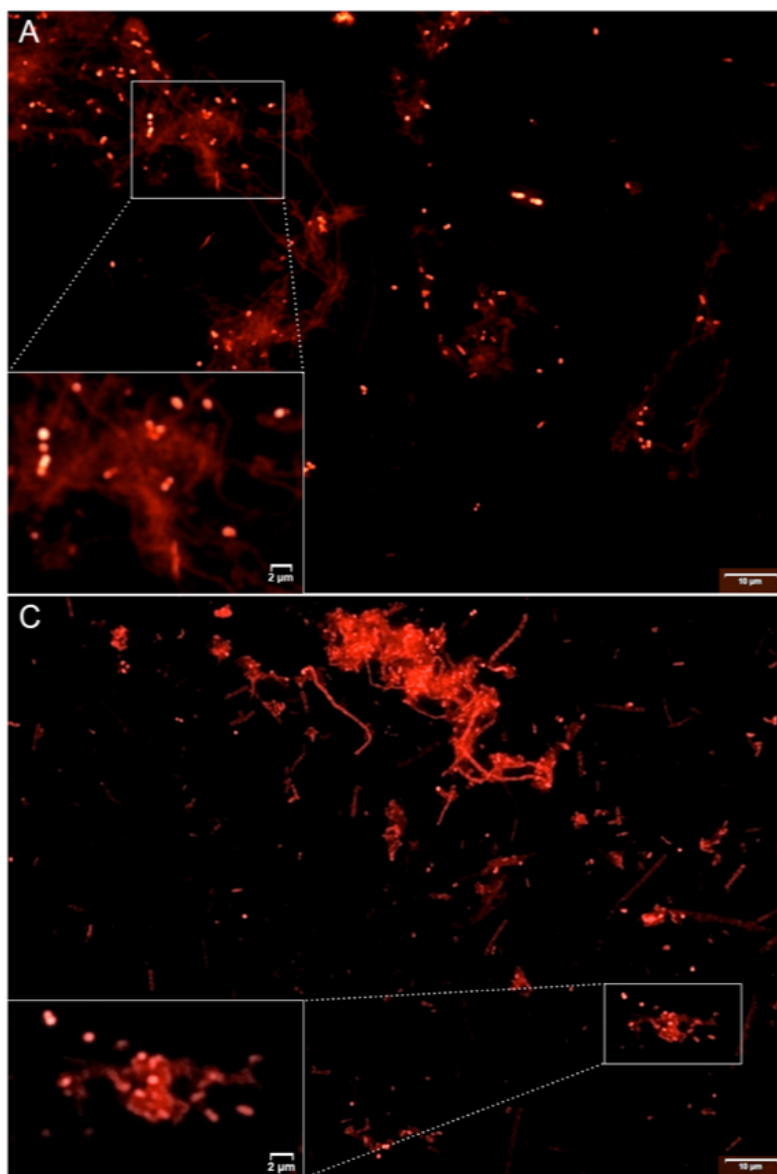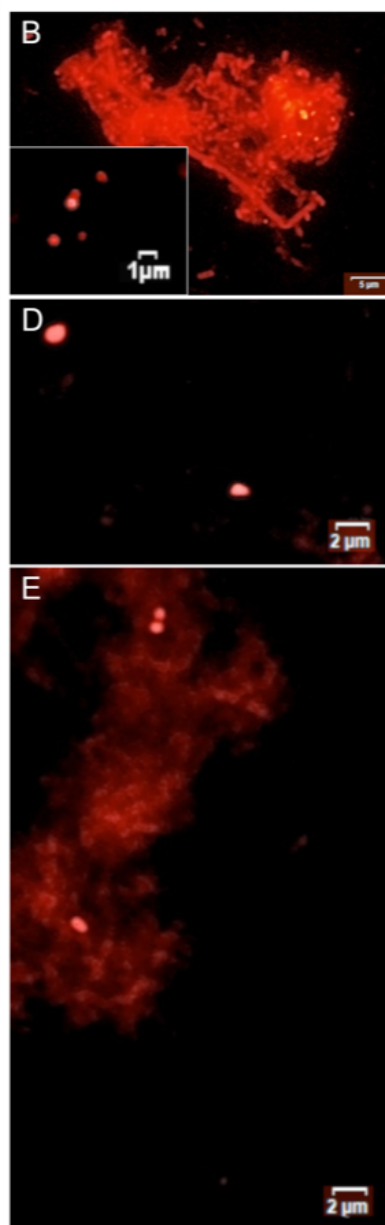

Supplement: s1 [file s1]
